# Supplementary material for: Gradient structured all-organic dielectrics by electrospinning for enhanced energy storage performance
Source: Royal Society of Chemistry journal article supplement (doi:10.1039/d4ta01527d), 2024-01-01
Supplement: d4ta01527d1.pdf [file d4ta01527d1.pdf]

**Gradient structured all-organic dielectrics by electrospinning for  
Enhanced energy storage performance**

Yuan Liu<sup>a</sup>, Hang Luo<sup>a\*</sup>, Haiyan Chen<sup>b</sup>, Minxi Li<sup>a</sup>, Yuting Wan<sup>a</sup>, Bo Peng<sup>a</sup>, Xiaona  
Li<sup>a</sup>, Dou Zhang<sup>a\*</sup>

a.State Key Laboratory of Powder Metallurgy, Central South University, Changsha  
410083, China

b.College of Energy and Power Engineering, Changsha University of Science and  
Technology, Changsha, Hunan 410114, China

\*Corresponding author

mail: [hangluo@csu.edu.cn](mailto:hangluo@csu.edu.cn) (Hang Luo)

[dzhang@csu.edu.cn](mailto:dzhang@csu.edu.cn) (Dou Zhang)

**Table S1.** The solution flow rates ( $v$ ) and the corresponding distribution functions of PVDF volume fraction ( $f_1$ ) in all-organic composites with different topological structures

| Topological configurations       | $v$ (ml/h)                           | The relationship between $f_1$ and $d$                     |
|----------------------------------|--------------------------------------|------------------------------------------------------------|
| Homogeneous structure            | $v_1=0.6$ ( $0 < t \leq T$ )         | $f_1=60\%$ ( $0 < d \leq 1$ )                              |
|                                  | $v_2=0.4$ ( $0 < t \leq T$ )         |                                                            |
| Trilayer structure               | $v_1=1; v_2=0$ ( $0 < t \leq 3T/5$ ) | $f_1=100\%$ ( $0 < d \leq 1/3$ )                           |
|                                  | $v_1=0; v_2=1$ ( $0 < t \leq 2T/5$ ) | $f_1=0$ ( $1/3 < d \leq 2/3$ )                             |
|                                  |                                      | $f_1=100\%$ ( $2/3 < d \leq 1$ )                           |
| Linear gradient structure        | $v_1=1-0.8t/T$ ( $0 < t \leq T$ )    | $f_1=1-1.6d$ ( $0 \leq d \leq 0.5$ )                       |
|                                  | $v_2=0.8t/T$ ( $0 < t \leq T$ )      | $f_1=1.6d-0.6$ ( $0.5 < d \leq 1$ )                        |
| Nonlinear gradient structure     | $v_1=1.2-1.2t/T$ ( $0 < t \leq T$ )  | $f_1 = 3 - \frac{6}{\sqrt{9-10d}}$ ( $0 \leq d \leq 0.5$ ) |
|                                  | $v_2=0.8t/T$ ( $0 < t \leq T$ )      | $f_1 = 3 - \frac{6}{\sqrt{10d-1}}$ ( $0.5 < d \leq 1$ )    |
| Rev-nonlinear gradient structure | $v_1=1.2t/T$ ( $0 < t \leq T$ )      | $f_1 = 3 - \frac{6}{\sqrt{10d+4}}$ ( $0 \leq d \leq 0.5$ ) |
|                                  | $v_2=0.8-0.8t/T$ ( $0 < t \leq T$ )  | $f_1 = 3 - \frac{6}{\sqrt{14-10d}}$ ( $0.5 < d \leq 1$ )   |

\* The subscripts of 1 and 2 represent PVDF and P(VDF-TrFE-CTFE), respectively.

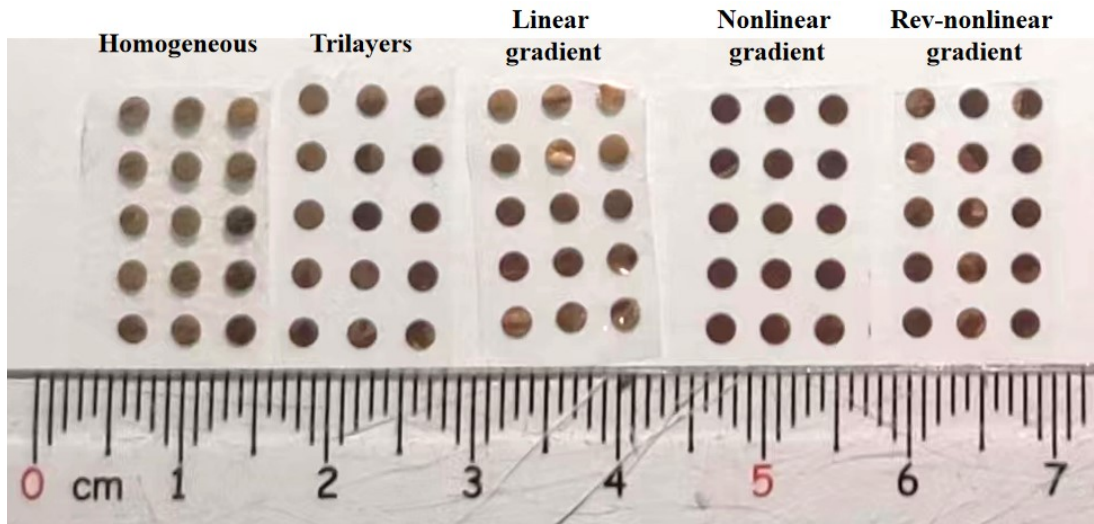

**Figure S1.** Photographs of composites with different topological structures that have been sputtered by gold electrodes

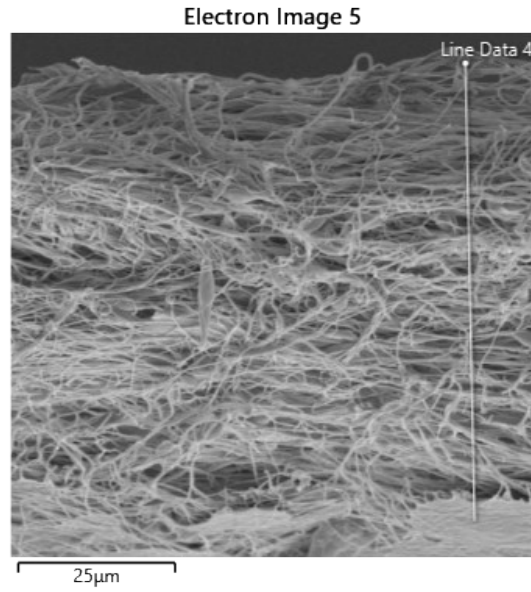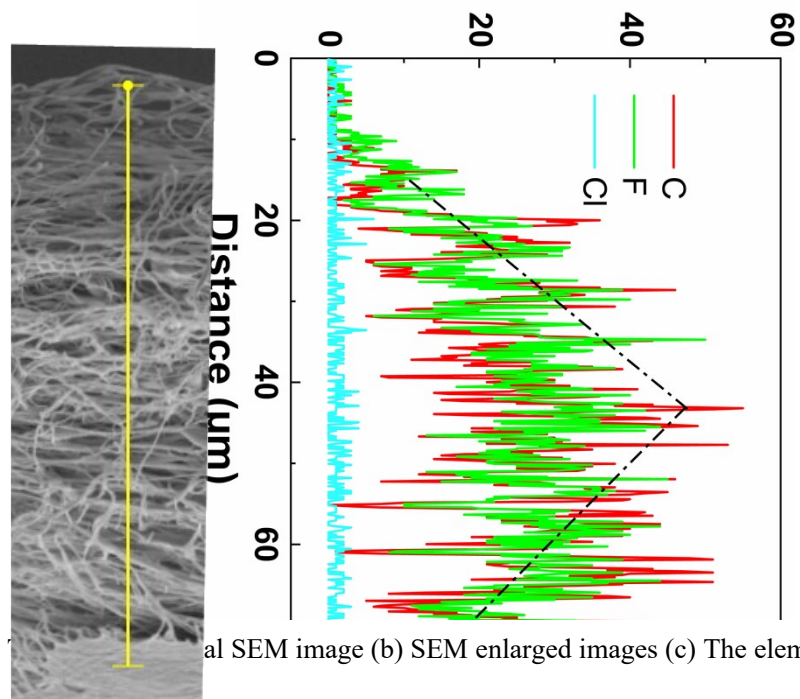

**Figure S2.** (a) Original SEM image (b) SEM enlarged images (c) The element mapping of C,F,Cl along the out-of-plane of linear gradient structured all-organic composite without hot pressing by electrospinning

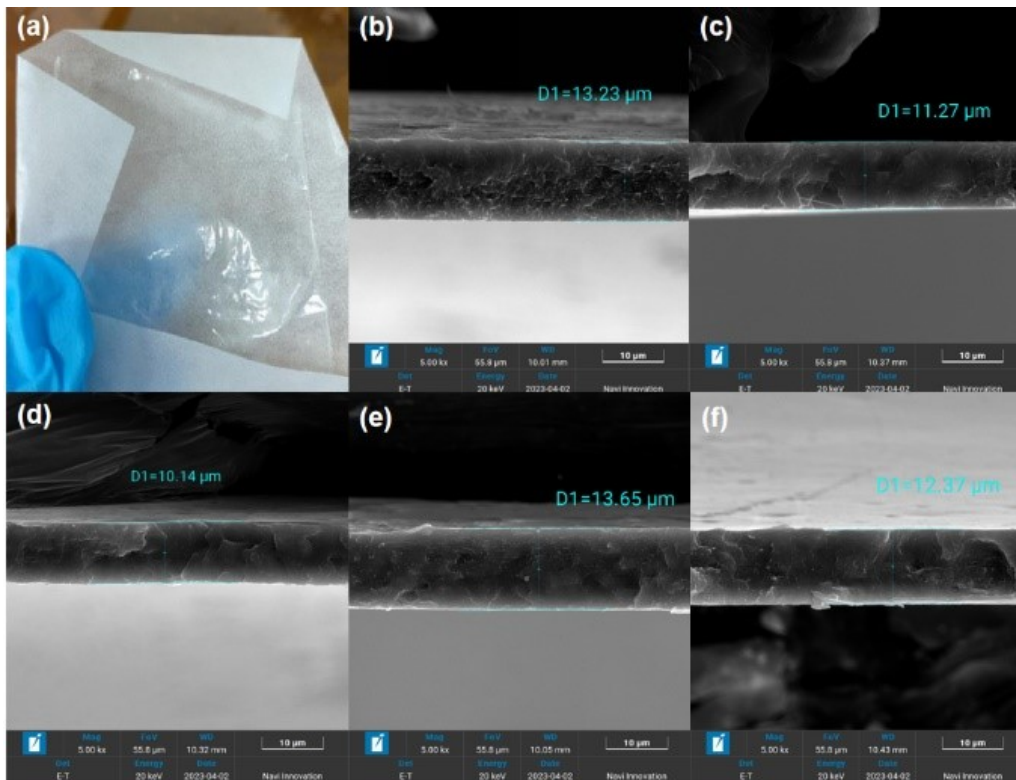

**Figure S3.** (a) Picture of transparent all-organic linear gradient structured composite obtained by hot-pressing; SEM images of composites cross-sections with different topological structures: (b) homogeneous structure, (c) trilayer structure, (d) linear gradient structure, (e) nonlinear gradient structure, (f) rev-nonlinear gradient structure

**Table S2.** The thermal properties and crystallinity of all-organic composites with different topological structures

| $T_{m1}$ (°C) | $T_{m2}$ (°C) | $\Delta T_{m1}$ (K) | $\Delta T_{m2}$ (K) | $\Delta H_{m1}$ (J/g) | $\Delta H_{m2}$ (J/g) | $\chi_1$ (%) | $\chi_2$ (%) |
|---------------|---------------|---------------------|---------------------|-----------------------|-----------------------|--------------|--------------|
| 167.99        | 122.99        | 441.25              | 396.14              | 24.94206              | 11.22575              | 39.78        | 10.69        |
| 167.89        | 124.89        | 440.65              | 398.04              | 23.06965              | 10.17609              | 36.79        | 9.69         |
| 166.89        | 123.89        | 440.05              | 397.04              | 23.21318              | 10.58457              | 37.02        | 10.08        |
| 167.86        | 125.86        | 441.05              | 399.01              | 23.49802              | 10.09086              | 37.48        | 9.61         |
| 168.86        | 124.86        | 442.45              | 398.01              | 23.68177              | 10.67103              | 37.77        | 10.16        |

\* The subscripts of 1 and 2 represent PVDF and P(VDF-TrFE-CTFE), respectively.

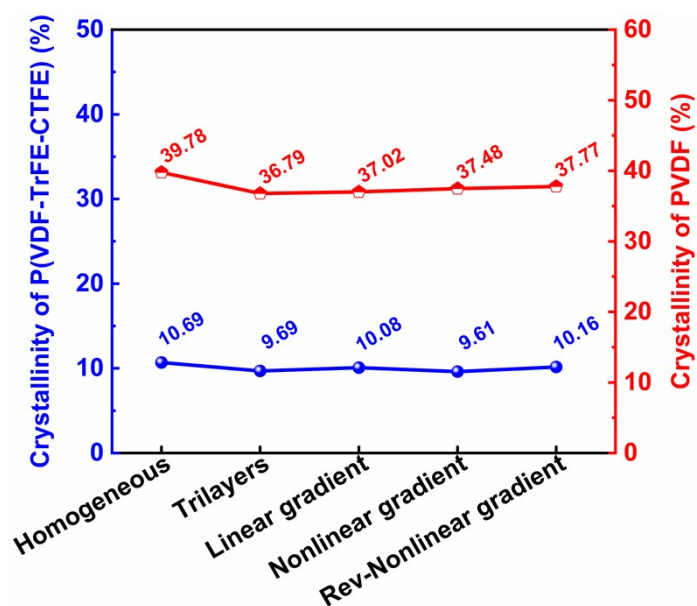

**Figure S4.** Crystallinity of P(VDF-TrFE-CTFE) and PVDF in polymer films with different topological structures

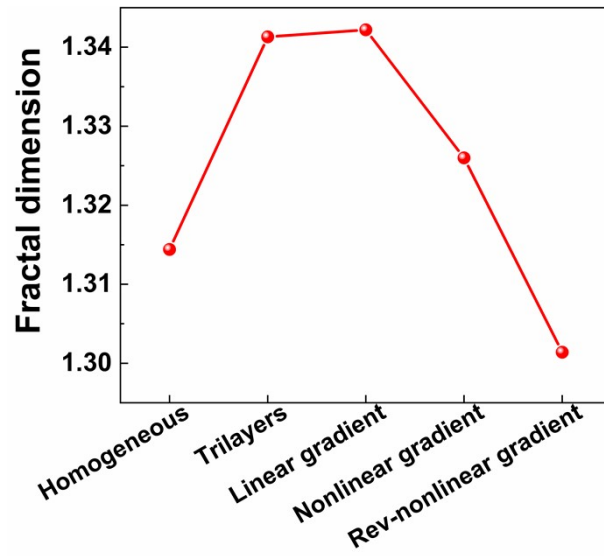

**Figure S5.** The fractal dimension of electric tree branches of composites with different topological structures

**Table S3.** Table of properties summary of all-organic composites with different topological structures

|                            | Homogeneous | Trilayers | Linear gradient | Nonlinear gradient | Rev-nonlinear gradient |
|----------------------------|-------------|-----------|-----------------|--------------------|------------------------|
| Dielectric constant @1 kHz | 19.00       | 20.43     | 19.59           | 19.61              | 19.74                  |
| Dielectric loss @1 kHz     | 0.0396      | 0.0378    | 0.0385          | 0.0402             | 0.0415                 |
| $D_{\max}$ @390 kV/mm      | 7.34        | 7.97      | 7.62            | 7.67               | 7.79                   |
| $D_r$ @390 kV/mm           | 1.83        | 1.14      | 0.96            | 1.15               | 1.30                   |
| $D_{\max}-D_r$             | 5.51        | 6.83      | 6.66            | 6.52               | 6.49                   |
| $E_{\max}$                 | 390         | 410       | 540             | 420                | 400                    |
| $E_b$                      | 366.5       | 376.5     | 477.8           | 395.2              | 354.2                  |
| $\beta$                    | 13.1        | 13.5      | 10.6            | 13.3               | 4.8                    |
| Young's modulus            | 1.05        | 1.12      | 1.30            | 1.20               | 0.95                   |
| $U_{\text{dis}}$           | 8.12        | 11.47     | 17.75           | 11.51              | 10.26                  |
| $\eta$                     | 57.67       | 72.26     | 70.26           | 70.85              | 66.82                  |
